# Supplementary material for: Quantifying the contribution of zoos and aquariums to peer-reviewed scientific research
Source: Atypon-hosted journal article supplement (doi:10.1139/facets-2017-0083), 2018-03-15
Supplement: facets-2017-0083_supplement1.xlsx [file facets-2017-0083_supplement1.xlsx]

## Sheet: TableS1
Table S1: List of all 228 AZA members and variables used in the regression analyses
Number	Name	Total Publications	Total Citations	Biodiversity Conservation Publications	Biodiversity Conservation Citations	Year Founded	Age During 2013	USA Organization	For Profit Organization	Government Organization	Non Government Organization	Non Profit Organization	IRS Year	Net Assets	Research in Mission	Mission Statement
1	Abilene Zoological Gardens	0	0	0	0	1966	47	1	0	0	0	1	2013	515047	1	To provide an animal-oriented educational/recreational resource for the citizens of Abilene and surrounding communities in order to promote environmental awareness, conservation, and research.
2	Acuariode Veracruz	6	41	1	0	1992	21	0	1	0	0	0			1	Provide our users a quality service in the aquatic species display, consolidating our position as the main tourist attraction in Veracruz. Keep the nature of research, scientific and conservation center of the aquatic ecosystems, promoting respect for the environment and focusing on vocations to the sciences of the sea and creating a suitable work environment.
3	Adventure Aquarium	2	15	0	0	1992	21	1	1	0	0	0			0
4	Africam Safari Park	0	0	0	0	1972	41	0	1	0	0	0			0
5	African Safari Wildlife Park	0	0	0	0	1973	40	1	1	0	0	0			1	Serve the community by maintaining and operating a wildlife park to provide recreation and educate the public to inspire an appreciation of all wildlife. An emphasis on conservation of all species especially endangered and threatened, through preservation, education and research. To provide the highest level of animal care and husbandry and support wildlife conservation programs through captive b…
6	Akron Zoological Park	2	0	0	0	1953	60	1	0	0	0	1	2012	60770346	0	As conservators of wild life, we exist to provide a dynamic, financially responsible, guest-oriented experience that is energized by innovation and fun.
7	Alameda Park Zoo	0	0	0	0	1898	115	1	0	1	0	0			1	The Alameda Park Zoo provides an aesthetically pleasing naturalistic environment, which promotes education in the environmental fields of study, conservation of local and global environments, recreation, and biological research. The intended concept is to instill through audio, visual, and tactical means, a unity of non-human and human relationships. Through professional cooperation and tactics, …
8	Alaska SeaLife Center	161	1449	4	79	1998	15	1	0	0	0	1	2012	46602787	1	The Alaska SeaLife Center generates and shares scientific knowledge to promote understanding and stewardship of Alaska’s marine ecosystems.
9	Albuquerque Biological Park	0	0	0	0	1927	86	1	0	0	1	0	2013	5148460	0	The New Mexico Bio Park Society's mission is to promote the development of, procurement for, and capital improvement of the Albuquerque Biological Park.
10	Alexandria Zoological Park	0	0	0	0	1926	87	1	0	1	0	0			0	The mission statement of Alexandria Zoological Park is to provide educational, cultural and recreational experiences for our visitors and our community through the professional management of a diverse collection of animals and programming which promotes the conservation of all wildlife.
11	Aquarium of the Bay	0	0	0	0	1996	17	1	1	0	0	0			0	The mission of the Aquarium of the Bay, in partnership with The Bay Institute, is to protect, restore and inspire conservation of San Francisco Bay and its watershed from the Sierra to the sea.
12	Aquarium of the Pacific	12	24	0	0	1998	15	1	0	0	0	1	2012	29035290	0	To instill a sense of wonder, respect, and stewardship for the Pacific Ocean, its inhabitants, and ecosystems.
13	Arizona Sonora Desert Museum	56	1122	11	384	1952	61	1	0	0	0	1	2012	24813830	0	The mission of the Arizona-Sonora Desert Museum is to inspire people to live in harmony with the natural world by fostering love, appreciation, and understanding of the Sonoran Desert.
14	Assiniboine Park Zoo	4	17	0	0	1904	109	0	0	0	0	1			0	Null
15	Atlantis	3	8	0	0	1998	15	0	1	0	0	0			0	Null
16	Audubon Aquarium of the Americas	2	4	0	0	1990	23	1	0	0	0	1	2012	11483575	1	Audubon Nature Institute operates a family of museums, parks and research facilities on behalf of the City of New Orleans, Louisiana, dedicated to celebrating the wonders of nature. Through innovative live animal exhibits, education programs, and scientific discovery, Audubon makes a meaningful contribution to preserving wildlife for the future. Audubon Nature Institute flagships include Audubon …
17	Audubon Zoo	16	79	2	4	1914	99	1	0	0	0	1	2012	11483575	1	Audubon Nature Institute operates a family of museums, parks and research facilities on behalf of the City of New Orleans, Louisiana, dedicated to celebrating the wonders of nature. Through innovative live animal exhibits, education programs, and scientific discovery, Audubon makes a meaningful contribution to preserving wildlife for the future. Audubon Nature Institute flagships include Audubon …
18	Bergen County Zoological Park	0	0	0	0	1960	53	1	0	1	0	0	2013	217018	0	Our mission is to instill in our guests a strong sense of appreciation and understanding of wildlife and wild places.
19	Bermuda Aquarium Museum and Zoo	9	110	2	16	1926	87	0	0	0	1	0			1	The shared mission of Bermuda Aquarium, Museum & Zoo and the Bermuda Zoological Society is to inspire appreciation and care of island environments. We fulfill our mission through our animal habitat exhibits, which focus on species from oceanic islands, as well as related environmental education, conservation projects and research programmes.
20	Binder Park Zoo	2	3	0	0	1977	36	1	0	0	0	1	2013	6915936	0	Through nurturing empathy, understanding, and conservation of nature, Binder Park Zoo's mission is to impact our region's economy, to meet the social needs of our region, and to educate our constituents to the wonders of the world.
21	Biodômede Montreal	61	1316	1	88	1992	21	0	0	1	0	0			1	Education, conservation and research nature is complex, beautiful and vulnerable. Through its representation of four ecosystems, the Biodôme strives to deliver an essential message: we are all part of nature and we can help protect it. The Biodôme also does its part to reach this goal through education, conservation and scientific research.
22	Birch Aquarium at Scripps	3	10	0	0	1903	110	1	0	1	0	0			0	The mission of Birch Aquarium is to provide ocean science education, to interpret Scripps Institution of Oceanography research, and to promote ocean conservation.
23	Birmingham Zoo	7	13	0	0	1955	58	1	0	0	0	1	2012	24588554	1	Inspiring passion for the natural world through emphasizing conservation, education, scientific study and recreation in all aspects of the Birmingham Zoo's exhibits, programs, facilities and activities.
24	Blank Park Zoo	2	9	0	0	1966	47	1	0	0	1	0	2013	15968915	1	The primary purposes of the foundation are a) to manage the Blank Park Zoo; b) to solicit, collect and provide funds to improve the facilities and programs of the zoo; c) to promote interest among the general public concerning the zoo; d) to implement and assist in the study of zoological natural history, animal behavior and the science allied therewith; e) to provide charitable and educational a…
25	Boonshoft Museum of Discovery	0	0	0	0	1893	120	1	0	0	0	1	2012	24081804	0	The mission of the Dayton Society of Natural History is to educate and enlighten all people of the region about the wonders of the world through the work of the Boonshoft Museum of Discovery and Sun Watch Indian Village/Archaeological Park. The mission of DSNH at Fort Ancient is to provide visitor and educational services focused on archaeology, Native American culture, and heritage stewardship a…
26	Bramble Park Zoo	0	0	0	0	1912	101	1	0	0	1	0	2013	680062	0	The mission of Bramble Park Zoo is to promote wildlife understanding and conservation through public education, maintenance of superior exhibits and high quality care for the animal collection. We also strive to provide our patrons with an enjoyable recreational experience.
27	Brandywine Zoo	0	0	0	0	1905	108	1	0	0	1	0	2013	1432065	0	The purpose of the Brandywine Zoo and the Delaware Zoological Society, Inc. is to professionally exhibit specific species of animals and provide a comprehensive program of conservation, education and recreation to the citizens of the State of Delaware and the Brandywine Valley.
28	BREC's Baton Rouge Zoo	3	5	0	0	1970	43	1	0	0	1	0	2013	401478	1	BREC’s Baton Rouge Zoo is a place where people connect with animals. We are therefore dedicated to cultivate an appreciation and concern for wildlife and wild places. We are committed to provide excellence in animal care and welfare, education, recreation, conservation and research that collectively inspire respect for nature.
29	Brevard Zoo	3	22	1	22	1994	19	1	0	0	0	1	2012	7508740	1	Our mission is "wildlife conservation through education and participation." To support that mission, we focuson providing top quality care for our animals,offering unique opportunities for guests to experience nature both on- and off-site, actively participating with Brevard County Public Schools to develop education programs that serve diverse audiences with authentic learning activities, and su…
30	Bronx Zoo WCS	56	755	4	142	1899	114	1	0	0	0	1	2013	680209739	1	The Wildlife Conservation Society saves wildlife and wild places worldwide. We do so through science, global conservation, education, and the management of the world's largest system of urban wildlife parks, led by the flagship Bronx Zoo. Together, these activities change attitudes towards nature and help people imagine wildlife and humans living in harmony. WCS is committed to this mission becau…
31	Brookgreen Gardens	2	0	0	0	1932	81	1	0	0	0	1	2013	39406178	0	To collect, preserve and exhibit American sculpture, and the flora and fauna native to South Carolina.
32	Buffalo Zoo	1	2	0	0	1875	138	1	0	0	0	1	2012	44865065	1	The establishment, maintenance, and operation of the Zoological Gardens for the education and recreation of the people and visitors of the Niagara Frontier, the advancement and encouragement of the science of Zoology, and the practice of conservation of wildlife of the world.
33	Busch Gardens	19	186	0	0	1959	54	1	1	0	0	0			0	(The desire to) enrich and entertain a global audience.
34	The Butterfly House	0	0	0	0	1995	18	1	0	0	1	0			0	"To foster a greater understanding of plant and animal relationships in the environment in order to promote the conservation and restoration of natural habitats."
35	Butterfly Pavilion	0	0	0	0	1995	18	1	0	0	0	1	2013	3801396	0	Our mission is to foster an appreciation of butterflies and other invertebrates, and to educate the public about the need for conservation of threatened habitats in the tropics and around the world.
36	Buttonwood Park Zoo	1	1	0	0	1894	119	1	0	0	1	0	2013	340913	0	The Buttonwood Park Zoo creates experiences for exploring and enjoying the natural world.
37	Cabrillo Marine Aquarium	9	78	1	15	1935	78	1	0	0	1	0	2013	1487237	1	Cabrillo Marine Aquarium engages all visitors in education, recreation and research to promote knowledge, appreciation and conservation of the marine life of Southern California.
38	Caldwell Zoo	7	76	0	0	1953	60	1	1	0	0	0			0	Null
39	Calgary Zoo	26	156	0	0	1929	84	0	0	0	0	1			0	Vision: Canada's leader in wildlife conservation. Mission: Take and inspire action to sustain wildlife and wild places.
40	California Science Center	1	0	0	0	1951	62	1	0	0	1	0	2013	26995911	0	The California Science Center is a dynamic destination where families, adults and children can explore the wonders of science through interactive exhibits, live demonstrations, innovative programs and awe-inspiring films. Help support our mission to inspire science learning in everyone!
41	Cameron Park Zoo	0	0	0	0	1955	58	1	0	0	0	1	2012	603827	0	The mission of the Cameron Park Zoo is to promote conservation awareness and cultural enrichment through education and recreation, to be a survival center for native and exotic animal species, and an active community partner in economic development through tourism.
42	Cape May County Park Zoo	0	0	0	0	1978	35	1	0	0	1	0	2013	119951	0	Null
43	Capron Park Zoo	0	0	0	0	1937	76	1	0	0	1	0	2013	162887	0	Exciting an interest in the natural world through conservation, education, and recreation.
44	Central Florida Zoological Park	1	7	0	0	1923	90	1	0	0	0	1	2012	8398005	0	The Central Florida Zoo & Botanical Gardens is a conservation resource providing experiences that excite and inspire children and adults to learn and act on behalf of wildlife.
45	Central Park Zoo WCS	1	2	1	0	1934	79	1	0	0	0	1	2013	680209739	0
46	Chahinkapa Zoo	0	0	0	0	1933	80	1	0	0	0	1	2013	1137650	0	Environmental education, wildlife conservation and family recreation.
47	Charles Paddock Zoo	0	0	0	0	1955	58	1	0	0	1	0	2013	40847	0	Null
48	Chattanooga Zoo	0	0	0	0	1937	76	1	0	0	1	0	2012	185877	0	The mission of the Chattanooga Zoo is to engage and inspire our community to better understand and preserve wildlife by creating meaningful connections between people and animals. With our intimate, innovative exhibits, wide-ranging educational offerings and commitment to conservation, our vision is to be a top destination for residents and visitors alike and the pride of our community.
49	Chehaw Wild Animal Park	0	0	0	0	1977	36	1	0	0	1	0			0	Null
50	Cheyenne Mountain Zoological Park	5	78	0	0	1926	87	1	0	0	0	1	2013	37972704	0	The Cheyenne Mountain Zoological Society owns and operates the Cheyenne Mountain Zoo. A leader in conservation captive breeding and animal care, the zoo connects people with wildlife and wild places through experiences that inspire action. A leader in the community, its purpose is to educate people and provide first-class animal experience that bring people into the awe and wonder of our animals …
51	Chicago Zoological Society	387	8442	28	745	1934	79	1	0	0	0	1	2012	152371000	0	The mission of the Chicago Zoological Society is to inspire conservation leadership by connecting people with wildlife and nature.
52	Childrens Zoo at Celebration Square	0	0	0	0	1929	84	1	0	0	0	1	2013	3735650	0	To be a resource to the Great Lakes Bay region through recreation, education and conservation.
53	Cincinnati Zoo and Botanical Garden	168	1387	1	2	1875	138	1	0	0	0	1	2013	77082246	1	The Society's mission is to operate one of the top zoos and botanical gardens in the country. The Zoo is a national historic landmark, known for its ability to create adventure, conserve nature, convey knowledge and serve our community. The Zoo is known for its breeding success with endangered species, its scientific research and outstanding educational programs, and for being one of only two bot…
54	Cleveland Metroparks Zoo	23	121	0	0	1882	131	1	0	0	1	0	2012	10077563	0	The Cleveland Zoological Society and Cleveland Metroparks Zoo share a mission - We create compelling experiences that connect people with wildlife and inspire personal responsibility for conserving the natural world.
55	Clyde Peelings Reptiland	1	17	0	0	1964	49	1	1	0	0	0			0	Null
56	Columbus Zoo and Aquarium	32	157	1	5	1927	86	1	0	0	0	1	2012	148914221	0	In working toward our mission to lead and inspire by connecting people and wildlife, there are three commitments that we prioritize: education, conservation, and caring for our animals. The Zoo’s late visionary leader, Jeff Swanagan, coined the phrase “touch the heart to teach the mind,” which is the foundation of our educational programming. By investing in outreach programs, field trips, develo…
57	Como Park Zoo and Conservatory	1	0	0	0	1897	116	1	0	0	1	0	2013	10754080	0	To inspire our public to value the presence of living things in our lives.
58	Connecticuts Beardsley Zoo	0	0	0	0	1922	91	1	0	0	0	1	2012	7343909	0	The Connecticut Zoological Society is responsible for the operations of Connecticut's Beardsley Zoo in Bridgeport, Connecticut, founded in 1922. The CZS exhibits rare and endangered species primarily from North and South America. Education of the visiting public in the areas of environmental and conservation science and issues is our primary goal. The CZS supports conservation efforts in Connecti…
59	Cosley Zoo	0	0	0	0	1973	40	1	0	1	0	0			0	To promote the understanding of relationship among humans, animals, and the environment through recreation, education, and wildlife conservation. - See more at: http://www.cosleyzoo.org/mission.htm#sthash.k0sUHaUA.dpuf
60	CuriOdyssey	1	0	0	0	1954	59	1	0	0	0	1	2013	12350925	0	CuriOdyssey, a science park for children, incorporates the foundations of the former Coyote Point Museum, but with a new vision. We are a stellar learning center that offers children a comprehensive introduction to the sciences. Our interactive science exhibits, exciting wildlife encounters, and engaging education programs give children authentic learning experiences that help develop an apprecia…
61	Dakota Zoo	0	0	0	0	1961	52	1	0	0	0	1	2012	4099619	0	Wild and domestic animals are cared for in the best environment for cleanliness and display for the public.
62	Dallas World Aquarium	10	28	0	0	1992	21	1	1	0	0	0			0	Null
63	Dallas Zoo	70	401	0	0	1888	125	1	0	0	1	0	2013	1256962	0	Inspiring passion for nature and conserving wildlife.
64	David Traylor Zoo of Emporia	0	0	0	0	1978	35	1	0	0	1	0	2013	232321	0	Null
65	Denver Zoological Gardens	104	924	25	336	1896	117	1	0	0	1	0	2013	14495136	0	Secure a better world for animals through human understanding.
66	Detroit Zoological Park	17	96	0	0	1883	130	1	0	0	0	1	2012	28077958	0	Demonstrate leadership in wildlife conservation and animal welfare; provide a broad audience with outstanding and unique educational opportunities that lead to the appreciation and stewardship of nature; inspire our community with engaging, meaningful and memorable experiences; provide innovative zoological facilities that contribute to the regions economic vitality; and demonstrate organizationa…
67	Dickerson Park Zoo	12	229	0	0	1922	91	1	0	0	1	0	2012	946908	0	Dickerson Park Zoo connects people with animals to create adventures that encourage discovery and inspire conservation action.
68	Disneys Animal Kingdom	178	1431	2	35	1998	15	1	1	0	0	0			0	Null
69	Dolphin Island	0	0	0	0	1991	22	0	1	0	0	0			0	Null
70	El Paso Zoo	4	26	0	0	1930	83	1	0	0	1	0	2013	2483918	0	The mission of the El Paso Zoo is to provide opportunities for encountering wildlife to the local community, schools, and visitors so they can have fun celebrating animals, conservation, and their own connection to nature.
71	Ellen Trout Zoo	0	0	0	0	1967	46	1	0	0	1	0	2013	831740	0	Null
72	Elmwood Park Zoo	0	0	0	0	1924	89	1	0	0	0	1	2013	3803877	0	To foster an appreciation for wildlife and the environment that will inspire active participation in conservation.
73	Erie Zoo	3	53	0	0	1930	83	1	0	0	0	1	2012	10223632	1	The mission of the Erie Zoological Society is to foster an appreciation of the natural world and the animals and plants that share it, establish educational recreational opportunities for all the people of Northwestern Pennsylvania, nurture the thrill of discovery and promote scientific study for people of all ages, provide the highest level of care for all of the animals, plants and items under …
74	Florida Aquarium	13	92	0	0	1995	18	1	0	0	0	1	2013	9860697	1	The Florida Aquarium's mission is to entertain, educate, and inspire stewardship about our natural environment. It accomplishes this mission through hosting over 645,000 visitors annually at the aquarium facility, and by presenting educational and community programs to the public. Animal programs, conservation and research projects are also conducted.
75	Fort Wayne Childrens Zoo	0	0	0	0	1965	48	1	0	0	0	1	2012	13429837	0	Our mission is to connect kids and animals, strengthen families, and inspire people to care. The Fort Wayne Zoological Society, Inc. accomplishes this by managing, operating and running the Fort Wayne Children's Zoo. The Zoo reaches more than 500,000 people on an annual basis.
76	Fort Worth Zoo	40	471	2	2	1909	104	1	0	0	0	1	2012	20994897	1	The mission of the Fort Worth Zoo is to strengthen the bond between humans and the environment by promoting responsible stewardship of wildlife and ensuring diverse, high-quality educational and entertaining family experiences through effective and efficient management of its resources. The foundation of this mission statement is based on three cornerstone principles: Conservation: A commitment t…
77	Fossil Rim Wildlife Center	24	203	0	0	1984	29	1	0	0	0	1	2012	11008436	1	Provide the conservation of animal species in peril, scientific research, training caregivers, disseminating information on conservation.
78	Franklin Park Zoo	8	38	0	0	1905	108	1	0	0	0	1	2013	14614301	1	Zoo New England manages Franklin Park Zoo in Boston and Stone Zoo in Stoneham, Massachusetts. Zoo New England's mission is to inspire people to protect and sustain the natural world for future generations by creating fun and engaging experiences that integrate wildlife and conservation programs, research and education.
79	Fresno Chaffee Zoo	2	3	0	0	1929	84	1	0	0	0	1	2012	23994011	0	The mission of the Fresno Chaffee Zoo is to provide a fun, unique and up-close experience that strengthens the bond between people and wildlife.
80	Georgia Aquarium	52	258	0	0	2005	8	1	0	0	0	1	2012	353599180	1	To be an entertaining, educational, and scientific institution featuring exhibits and programs of the highest standards, offering engaging guest experiences, and promoting the conservation of aquatic biodiversity throughout the world.
81	Gladys Porter Zoo	27	129	0	0	1971	42	1	0	0	1	0	2012	1697364	1	The Gladys Porter Zoo is a visitor-oriented zoological and botanical park, dedicated to the preservation of nature through education, conservation and research.
82	Granby Zoo	3	17	0	0	1953	60	0	0	0	0	1			0	Granby Zoo's mission is for visitors to enjoy a unique educational and recreational experience (adventure) through close proximity with mainly endangered or exotic animals, in the context of conservation and scientific development within high quality recreational facilities.
83	Great Plains Zoo and Museum	0	0	0	0	1963	50	1	0	0	0	1	2012	4012784	0	The Great Plains Zoo and Delbridge Museum of Natural History fosters greater understanding of our natural world through education, conservation, recreation and discovery.
84	Greensboro Science Center	0	0	0	0	1957	56	1	0	0	0	1	2013	4914411	0	The Center is comprised of a museum, omnisphere, sciquarium, sales shop and zoo. The Center is committed to excellence in science education by providing the community with a dynamic, experiential and family-focused attraction designed to inspire scientific curiosity and encourage personal discovery about life and the natural world.
85	Greenville Zoo	1	1	0	0	1960	53	1	0	0	1	0			1	The mission of the Greenville Zoo is to serve our community by promoting an appreciation of nature and wildlife while providing a unique opportunity to recreate and participate in innovative programs for education and conservation. We will serve as a model for conservation and conduct ongoing research to enhance the world we live in. The Greenville Zoo is dedicated to the welfare of the animals i…
86	Grizzly Wolf Discovery Center	0	0	0	0	1993	20	1	0	0	0	1	2013	4636866	1	The Grizzly & Wolf Discovery Center's primary mission is to provide visitors to the Yellowstone area an opportunity to learn about, view and ultimately appreciate the grizzly bear and gray wolf. All of the grizzly bears at the Center lost the opportunity to live out their lives in the wild as a result of human/bear conflict situations. By helping with the education of visitors, their lives may he…
87	Happy Hollow Zoo	0	0	0	0	1961	52	1	0	0	1	0			0	Happy Hollow Park & Zoo connects people to nature through play!
88	Henry Vilas Zoo	3	20	0	0	1911	102	1	0	0	1	0	2013	4210411	0	The purposes of the Henry Vilas Park Zoological Society are to educate the public in Zoology, to teach the value thereof to the public, to stimulate in the public an interest in and appreciation of the animal kingdom,to teach the public to be kind to animals and to prevent cruelty to animals, and to further these purposes,to promote the Henry Vilas Zoo located in the city of Madison, Wisconsin,an…
89	Henson Robinson Zoo	1	0	0	0	1970	43	1	0	0	1	0	2013	20262	0	Null
90	Honolulu Zoo	12	220	0	0	1916	97	1	0	0	1	0	2013	665034	0	The mission of the Honolulu Zoo is to inspire the stewardship of our living world by providing meaningful experiences to our guests. The Zoo emphasizes Pacific Tropical ecosystems and our traditional values of malama (caring) and ho’okipa (hospitality).
91	Houston Zoo	43	175	2	3	1922	91	1	0	0	0	1	2013	102980923	0	The Houston Zoo's mission is to provide a fun, unique, and inspirational experience fostering appreciation, knowledge, and care for the natural world.
92	Hutchinson Zoo	0	0	0	0	1986	27	1	0	0	1	0	2013	307619	0	The Hutchinson Zoo strives to serve as a quality recreational and animal rehabilitation facility, while inspiring community involvement and furthering conservation education on behalf of wildlife.
93	Indianapolis Zoological Society	43	393	1	55	1964	49	1	0	0	0	1	2012	128918030	0	The Indianapolis Zoo will empower people and communities, both locally and globally, to advance animal conservation.
94	International Crane Foundation	63	363	9	133	1973	40	1	0	0	0	1	2013	20601922	0	ICF works worldwide to conserve cranes and the ecosystems, watersheds, and flyways on which they depend. ICF provides knowledge, leadership, and inspiration to engage people in resolving threats to cranes and their diverse landscapes.
95	Jackson Zoological Park	3	8	0	0	1919	94	1	0	0	1	0	2013	3704709	0	The mission of the Jackson Zoo is to provide visitors with a quality recreational and educational environment dedicated to wildlife care and conservation.
96	Jacksonville Zoo and Gardens	8	67	0	0	1914	99	1	0	0	1	0	2012	51994808	0	The Jacksonville Zoo & Gardens strives to inspire discovery, appreciation and conservation of wildlife, plants and natural resources through innovative experiences in a caring environment. The Jacksonville Zoo & Gardens fosters understanding that empowers people to respect and conserve their natural environment by creating innovative educational and recreational experiences that engage our guests…
97	Jenkinsons Aquarium	0	0	0	0	1991	22	1	1	0	0	0			0	To educating the public on all aspects of marine life and conservation.
98	John Ball Zoological Gardens	3	125	0	0	1891	122	1	0	0	1	0	2012	7317768	1	To advance public education on the need for wildlife conservation and preservation; to cooperate in the captive propagation of wild and endangered animal species. To promote the welfare of the John Ball Zoological Garden and its advancement as a public education institution, as a scientific center, as a natural science and wildlife exhibit and conservation agency and as a cultural and recreationa…
99	John G. Shedd Aquarium	47	329	7	82	1930	83	1	0	0	0	1	2012	327972606	0	At Shedd Aquarium, animals connect you to the living world, inspiring you to make a difference. Our exhibits and learning programs encourage people to support conservation efforts that protect wildlife and their habitats around the world.
100	Kansas City Zoo	33	144	0	0	1909	104	1	0	0	1	0	2012	12611973	0	To conserve and provide access to wildlife to entertain and educate our visitors in order to install a sustained respect for nature.
101	Knoxville Zoological Gardens	12	85	1	0			1	0	0	0	1	2012	18124587	1	The mission of Knoxville Zoological Gardens is to celebrate the wonders of the natural world. Through education, conservation, exhibition, research and recreation, the zoo will tell the stories of the animals, the plants and the people who make up the communities of the earth. The zoo will develop positive attitudes and actions about nature and about conservation as a local and global issue.
102	Lake Superior Zoo	1	39	0	0	1923	90	1	0	0	1	0	2012	300619	0	To provide close-up animal experiences which inspire connections to wildlife and action toward conservation in our region and around the world.
103	Landrys Downtown Aquarium	0	0	0	0	2005	8	1	1	0	0	0			0	Null
104	Landrys Houston Aquarium	0	0	0	0	2003	10	1	1	0	0	0			0	Null
105	Lee G. Simmons Conservation Park and Wildlife Safari	0	0	0	0			1							0
106	Lee Richardson Zoo	0	0	0	0	1927	86	1	0	0	1	0	2012	695601	0	Inspiring conservation of wildlife and wild places.
107	Lehigh Valley Zoo	0	0	0	0	1974	39	1	0	0	0	1	2013	930955	1	To create a safe, engaging and enlightening wildlife experience for guests of all ages as it demonstrates leadership in the cultural, scientific and conservation community.
108	Lincoln Childrens Zoo	0	0	0	0	1965	48	1	0	0	0	1	2013	5280532	0	To enrich lives through firsthand interaction with living things.
109	Lincoln Park Zoological Gardens	221	2335	11	344	1868	145	1	0	0	0	1	2013	75045468	1	Lincoln Park Zoo is dedicated to connecting people with nature by providing a free, family-oriented wildlife experience in the heart of Chicago and by exhibiting leadership and advancing the highest quality of animal care, education, science and conservation.
110	Lion Country Safari	10	34	0	0	1967	46	1	1	0	0	0			0	Null
111	Little Rock Zoological Gardens	6	6	0	0	1926	87	1	0	0	1	0	2012	559400	0	To provide engaging experiences that inspire people to value and conserve our natural world.
112	Living Desert	3	104	0	0	1970	43	1	0	0	0	1	2013	46810064	0	Desert conservation through preservation, education and appreciation.
113	Living Desert Zoo Gardens	0	0	0	0			1	0	1	0	0	2012	1075678	0
114	Los Angeles Zoo and Botanical Gardens	35	239	0	0	1966	47	1	0	0	1	0	2013	22847126	0	The mission of the Los Angeles Zoo is to provide an environment for recreation and discovery; inspire an appreciation of wildlife through exhibitry and education; ensure the highest level of animal welfare; and support programs that preserve biodiversity and conserve natural habitat.
115	Louisville Zoological Garden	2	7	0	0	1969	44	1	0	0	1	0	2013	1891600	0	"Better the Bond Between People and Our Planet” by providing excellent care for animals, a great experience for visitors, and leadership in conservation education.
116	Lowry Park Zoo	7	58	0	0	1957	56	1	0	0	0	1	2013	32101414	0	The Lowry Park Zoological Society of Tampa, Inc. is a 501(c)(3) nonprofit charitable organization in agreement with the City of Tampa. The Society operates Tampa's Lowry Park Zoo to fulfill its mission. The Zoo provides programs in education and conservation that benefit the general public and enhance the quality of life in Tampa Bay. Also, the Zoo exists as a center for conservation of endangere…
117	Maritime Aquarium at Norwalk	2	49	0	0	1988	25	1	0	0	0	1	2013	16783728	1	The Maritime Aquarium inspires people of all ages to appreciate Long Island Sound and protect it for future generations. A vibrant and entertaining learning environment, the Maritime Aquarium achieves this goal through living exhibits, marine science, and environmental education.
118	Maryland Zoo in Baltimore	20	213	0	0	1876	137	1	0	0	1	0	2013	47706950	0	To inspire and educate people to join with the Zoo in the active support and conservation of wildlife and wild places; to serve our communities by engaging people with the wonder of the living world through personal encounters that foster lifelong harmonious relationships with nature.
119	Memphis Zoological Garden and Aquarium	54	218	3	8	1906	107	1	0	0	1	0	2013	20415278	0	The Memphis Zoological Society is building one of the world's great zoos in Memphis. Our staff and volunteers are dedicated to providing a naturalistic and enriching sanctuary for our animals and a clean, friendly, entertaining, and educational experience for our guests.
120	Mesker Park Zoo Botanic Garden	4	24	0	0	1928	85	1	0	0	1	0	2013	1224387	0	To foster the preservation of the Earth’s diverse species and living systems through an active role in education and conservation.
121	Mill Mountain Zoo	0	0	0	0	1952	61	1	0	0	0	1	2011	1070173	0	To foster appreciation and promote understanding of conservation of animals and their related habitats through the use of quality exhibits and educational programs.
122	Miller Park Zoo	0	0	0	0	1914	99	1	0	0	1	0	2013	454778	0	Null
123	Milwaukee County Zoological Gardens	39	220	1	10	1892	121	1	0	0	1	0	2013	1621084	0	Conserve endangered animals in the places where they live, educate the community about wildlife and support the Milwaukee County Zoo.
124	Minnesota Zoological Garden	21	271	5	122	1978	35	1	0	0	1	0	2013	3972064	0	To connect people, animals and the natural world.
125	Monterey Bay Aquarium	77	2263	1	1	1984	29	1	0	0	0	1	2012	304704564	1	The mission of the Monterey Bay Aquarium is to inpsire conservation of the oceans. In 2012 we reached two attendance milestones-50 million visitors welcomed into the Aquarium since we opened in 1984, and 2 million students hosted for a free school visit. We are proud to say we've educated and entertained generations of visitors about the wonders of the oceans through compelling live exhibits, int…
126	Moody Gardens Rainforest and Aquarium	3	4	0	0	1986	27	1	0	0	0	1	2013		1	Providing an educational destination utilizing nature in the advancement of rehabilitation, conservation, recreation and research.
127	Mote Marine Laboratory and Aquarium	641	13382	12	163	1980	33	1	0	0	0	1	2013	34548061	1	The advancement of marine and environmental sciences through scientific research, education and public outreach, leading to new discoveries, revitalization and sustainability of our oceans and greater public understanding of our marine resources.
128	Museum of Science	0	0	0	0	1830	183	1	0	0	0	1	2013	203421407	0	The Museum's mission is to play a leading role in transforming the nation's relationship with science and technology. This role becomes ever more important as science and technology shape and reshape our lives and world, and it means we: Promote active citizenship informed by the world of science and technology; Inspire lifelong appreciation of the importance and impact of science and engineering…
129	Mystic Aquarium Institute for Exploration	41	285	0	0	1973	40	1	0	0	0	1	2012	25001098	1	To inspire people to care for and protect our ocean planet through education, research, and exploration.
130	Naples Zoo	2	1	0	0	1969	44	1	0	0	0	1	2013	11297684	0	Naples Zoo seeks to delight guests with the natural world to inspire the conservation of our planet's wild areas and their wondrous inhabitants.
131	Nashville Zoo	8	93	0	0	1990	23	1	0	0	0	1	2013	38646029	0	Nashville Zoo's mission is to inspire a culture of understanding and discovery of our natural world through conservation, innovation, and leadership.
132	National Aquarium	74	1030	0	0	1981	32	1	0	0	0	1	2013	73976377	0	To inspire conservation of the world's aquatic treasures.
133	National Aviary	43	469	12	90	1952	61	1	0	0	0	1	2013	18983815	1	The National Aviary in Pittsburgh is an education and conservation driven zoological organization whose mission is to inspire respect for nature through an appreciation of birds. We are the only independent indoor nonprofit zoo dedicated exclusively to birds. The Aviary's three-acre campus in an urban park on Pittsburgh's North Side includes family-friendly interactive exhibits and recreational f…
134	National Mississippi River Museum Aquarium	1	0	0	0	2003	10	1	0	1	0	0	2013	47594027	0
135	New England Aquarium	269	3959	9	217	1969	44	1	0	0	0	1	2013	53131509	0	The New England Aquarium combines education, entertainment and action to address the most challenging problems facing the oceans. We aim to create a new generation of ocean stewards, while providing regional, national and global leadership in marine conservation. The New England Aquarium is the only Boston-based cultural institution with a mission focused primarily on the environment, promoting t…
136	New York Aquarium WCS	26	1000	2	38	1896	117	1	0	0	0	1	2013	680209739	0
137	Newport Aquarium	0	0	0	0	1999	14	1	1	0	0	0			0	Null
138	North Carolina Aquarium Fort Fisher	7	27	0	0	1976	37	1	0	0	1	0	2013	12899404	0	To develop, encourage, and promote public awareness of and appreciation for North Carolina's coastal natural and cultural heritage; to serve as a philanthropic society for the support, maintenance of programs, and development of facilities of the North Carolina Aquariums, and to solicit, hold, invest, and expend funds for such purposes; and to render assistance as requested by the North Carolina …
139	North Carolina Aquarium Pine Knoll Shores	2	1	0	0	1976	37	1	0	0	1	0	2013	12899404	0
140	North Carolina Aquarium Roanoke Island	0	0	0	0	1976	37	1	0	0	1	0	2013	12899404	0
141	North Carolina Zoological Park	4	17	1	1	1974	39	1	0	0	1	0	2013	20241801	1	Its missions in education, conservation, research and recreation.
142	Northeastern Wisconsin Zoo	0	0	0	0	1952	61	1	0	0	1	0	2013	478744	0	The organization is committed to the preservation and enhancement of the NEW Zoo, and to provide families, youth and adults with educational opportunities to view selected animals and exhibits.
143	Northwest Trek Wildlife Park	0	0	0	0	1975	38	1	0	0	1	0	2013	621668	0	The Northwest Trek Foundation is a Washington state registered 501(c) 3 non-profit organization that promotes conservation,education and recreation to a regional and national community through the display of northwest native wildlife in their habitats at Northwest Trek Wildlife Park. Mobilizing volunteers and donors to bring their time, talent and financial resources to support NWT programs is ke…
144	Oakland Zoo	13	13	0	0	1922	91	1	0	0	0	1	2013	44954151	0	The mission of the Oakland Zoo is to inspire respect for and stewardship of the natural world, while providing a quality visitor experience.
145	Ocean Park Corporation	21	389	0	0	1977	36	0	0	0	0	1			0	Ocean Park provides all guests with memorable experiences that combine entertainment and education, while inspiring life long learning and conservation advocacy. Our aim is to maintain a healthy financial status, while striving to deliver the highest standards of safety, animal care, products and guest service.
146	Oglebay's Good Zoo	0	0	0	0	1977	36	1	0	0	1	0	2013	7655228	0	To educate our visitors regarding natural and physical sciences and to promote conservation.
147	Oklahoma City Zoological Park	18	96	0	0	1902	111	1	0	0	1	0	2013	1276862	1	The Oklahoma Zoological Society is a nonprofit organization created to support and promote the Oklahoma City Zoological Park and its programs in education, conservation, zoological research and recreation.
148	Omahas Henry Doorly Zoo & Aquarium	14	34	0	0	1894	119	1	0	0	0	1	2012	112931786	1	The Omaha Zoological Society's mission has four tenets: 1.) promote and encourage recreational activities for the public in the context of wild animals and their habitats; 2.) promote, establish and maintain educational activities and programs to enhance the knowledge of the general public and the zoological staff in all areas relating to the natural world; 3.) promote conservation of rare and en…
149	Oregon Coast Aquarium	12	45	0	0	1992	21	1	0	0	0	1	2012	9308437	0	The Aquarium's mission is to maintain the highest quality aquatic and marine science programs for recreation and education so that the public better understands, cherishes, and conserves the world's natural marine and coastal resources.
150	Oregon Zoo	42	456	4	171	1888	125	1	0	0	1	0	2013	11930981	1	The Oregon Zoo inspires the community to respect animals and take action on behalf of the natural world. We do this by creating engaging experiences and advancing the highest level of animal welfare, environmental literacy and conservation science.
151	Palm Beach Zoo	18	51	0	0	1951	62	1	0	0	0	1	2013	34434358	1	The Zoological Society of the Palm Beaches exists to protect wildlife and wildlife habitat, and to inspire others to value and conserve the natural world through endangered species propagation, education, health and wellness, field research, and conservation medicine.
152	Parque Zoologicode Leon	0	0	0	0	1979	34	0	0	1	0	0			0	Null
153	Peoria Zoo	0	0	0	0	1955	58	1	0	0	1	0	2013	4127358	0	Aid in improvement and development of the Glen Oak Zoo.
154	Philadelphia Zoo	28	230	1	14	1859	154	1	0	0	0	1	2013	93477526	1	The Philadelphia Zoo, America's first zoo, is dedicated to its mission of conservation, science, education, and recreation. The core purpose is to advance discovery, understanding, and stewardship of the natural world through compelling exhibition and interpretation of living animals and plants. As an educational and recreational resource, the Zoo serves over 1.2 million people every year. It als…
155	Phoenix Zoo	18	127	1	3	1962	51	1	0	0	0	1	2013	41592541	0	The Phoenix Zoo provides experiences that inspire people and motivate them to care for the natural world.
156	Pittsburgh Zoo & PPG Aquarium	15	129	2	51	1898	115	1	0	0	0	1	2013	45571412	1	The Pittsburgh Zoo & PPG Aquarium will: provide an enjoyable family experience which fosters understanding, respect and appreciation for wildlife; offer a variety of unique educational programs with a strong emphasis on conservation; be acknowledged as a culturally significant facility; be recognized for the excellence of our collection, programs, and exhibitry; be a leader and significant contri…
157	Point Defiance Zoo & Aquarium	28	398	1	13	1905	108	1	0	0	1	0	2013	843108	0	Point Defiance Zoo & Aquarium practices and promotes effective conservation on behalf of the world’s wildlife.
158	Potawatomi Zoo	5	22	0	0	1902	111	1	0	0	1	0	2012	1066564	0	To solicit, collect, and provide.
159	Potter Park Zoological Gardens	13	141	0	0	1915	98	1	0	0	1	0	2013	37541	0	Dedicated to the support of the Potter Park Zoo 1) through preserving, protecting, and exhibiting selected members of the animal kingdom so the future genrations of mankind may thrive in harmony with nature, and 2) through providing a quality environment where visitors from all
160	Prospect Park Zoo WCS	1	0	0	0	1935	78	1	0	0	0	1	2013	680209739	0
161	Pueblo Zoo	0	0	0	0	1940	73	1	0	0	0	1	2013	6005337	0	The mission of the Pueblo Zoological Society is to promote appreciation and understanding of the natural world while providing a quality environment at the Pueblo Zoo for animals and visitors. The Pueblo Zoological Society worked as a support group for the city-owned and operated Zoo until 1990 and, in 1991, assumed private management of the facility under an agreement with the City. Since then t…
162	Queens Zoo WCS	3	135	1	126	1968	45	1	0	0	0	1	2013	680209739	0
163	Racine Zoological Gardens	0	0	0	0	1923	90	1	0	0	0	1	2013	2177768	1	To foster an enlightening and affordable wildlife experience that improves the bond between people and nature. The Society will provide for the recreation and education of the people, the conservation of wildlife and wild places, and the advancement of science.
164	Red River Zoo	0	0	0	0	1999	14	1	0	0	0	1	2014	3773767	0	To foster awareness and appreciation of wildlife, to advance public education on the need for wildlife conservation and preservation, to exchange information and services with individuals and organizations interested in wildlife topics and issues.
165	Reid Park Zoo	0	0	0	0	1965	48	1	0	0	1	0	2013	4571590	0	To encourage commitment to the conservation of biological diversity and to provide educational and fun experiences for visitors of all ages.
166	Ripleys Aquarium Myrtle Beach	1	5	0	0	1997	16	1	1	0	0	0			0	To entertain and delight our guests in a top quality marine life facility.
167	Ripleys Aquarium Smokies	5	15	0	0	1997	16	1	1	0	0	0			1	Our mission is to provide a top quality, world class aquatic life facility that will foster environmental education, conservation, and research, while simultaneously providing entertainment for visitors of all ages.
168	Riverbanks Zoological Park	9	53	1	0	1974	39	1	0	0	1	0	2013	2232818	0	To foster appreciation and concern for all living things. We are dedicated to providing: the highest standards of care for our animal and plant collections; a diverse educational and high-quality recreational experience for all riverbanks visitors; all the resources at our disposal for the conservation of the Earth's flora and fauna.
169	Riverside Discovery Center	0	0	0	0	1950	63	1	0	0	1	0	2013	1510375	1	To inspire a sense of awe and stewardship for the natural world by supporting conservation, education, discovery and recreation.
170	Roger Williams Park Zoo	22	159	0	0	1872	141	1	0	0	0	1	2013	965648	0	To serve the community as a valued resource for education, conservation and recreation.
171	Rolling Hills Zoo	2	7	0	0	1995	18	1	0	0	0	1	2012	6190079	0	Rolling Hills Wildlife Adventure Foundation is dedicated to the preservation of wildlife through participation in conservation programs and by providing fun and interactive educational experiences.
172	Roosevelt Park Zoo	0	0	0	0	1920	93	1	0	0	0	1	2013	614507	0	Operation of zoo for general public.
173	Rosamond Gifford Zoo at Burnet Park Zoo	4	13	0	0	1914	99	1	0	0	1	0	2012	5008093	0	To connecting people to the natural world by providing engaging guest experiences, exceptional animal care, and unparalleled conservation education.
174	Sacramento Zoo	7	38	0	0	1927	86	1	0	0	0	1	2012	10765439	0	The Sacramento Zoo inspires appreciation, respect and a connection with wildlife and nature through education, recreation and conservation.
175	Safari West	2	4	0	0	1970	43	1	1	0	0	1	2013	116662	1	The specific objective of this corporation shall be to conserve wildlife through education and research.
176	St. Augustine Alligator Farm	4	26	0	0	1893	120	1	1	0	0	0			0	Our missions of education and conservation.
177	Saint Louis Zoo	213	2469	12	205	1904	109	1	0	0	1	0	2012	92042983	1	To conserve animals and their habitats through animal management, research, recreation, and educational programs that encourage the support and enrich the experience of the public.
178	Salisbury Zoological Park	0	0	0	0	1954	59	1	0	0	1	0	2012	703455	0	The Salisbury Zoological Park is committed to enhancing our quality of life by providing a friendly, relaxing environment where educational and recreational opportunities come together through participation and interaction. With its animals, staff, volunteers, and park-like setting, the zoo encourages an appreciation of wildlife and inspires conservation of our natural world.
179	San Antonio Zoological Society	21	66	2	3	1914	99	1	0	0	0	1	2013	36689024	0	It is the mission of the San Antonio Zoological Gardens and Aquarium to foster appreciation and concern for all living things. We are dedicated to providing: - The highest standard of care for our animal and plant collection, - A diverse educational and high quality recreational experience for all people - And all resources at our disposal for the conservation of the Earth's flora and fauna.
180	San Diego Zoo	221	1860	16	204	1916	97	1	0	0	0	1	2013	320991117	1	San Diego Zoo Global is committed to saving species worldwide by uniting our expertise in animal care and conservation science with our dedication to inspiring passion for nature.
181	San Diego Zoo Safari Park	7	20	0	0	1916	97	1	0	0	0	1	2013	320991117	0
182	San Francisco Zoological Gardens	18	100	1	13	1929	84	1	0	0	0	1	2013	13759156	0	The San Francisco Zoo connects people with wildlife, inspires caring for nature and advances conservation action.
183	Santa Ana Zoo	1	15	0	0	1952	61	1	0	0	1	0	2012	1383146	0	To instill a passion for the natural world through education, recreation and conservation.
184	Santa Barbara Zoological Gardens	0	0	0	0	1963	50	1	0	0	0	1	2012	25925490	1	The Santa Barbara Zoo is dedicated to the preservation, conservation, and enhancement of the natural world and its living treasures through education, research and recreation.
185	Santa Fe Community College Teaching Zoo	0	0	0	0	1970	43	1	0	1	0	0			0	Null
186	Scovill Zoo	0	0	0	0	1967	46	1	0	0	1	0	2014	1351186	0	The mission of the Decatur Park District is to enrich the community’s quality of life and economic vitality by providing outstanding parks, programs, facilities, and recreational opportunities.
187	SEA Aquarium	0	0	0	0	2012	1	0	1	0	0	0			0	Conservation education and awareness programmes are part of Marine Life Park’s conservation mission.
188	SEA LIFE Aquarium	0	0	0	0	2012	1	1	1	0	0	0			0	Sea Life Centres aim to combine modern display technology, biological expertise, and entertainment to provide themed journeys through European and tropical waters.
189	SEA LIFE Grapevine	1	1	0	0	2012	1	1	1	0	0	0			0	Sea Life Centres aim to combine modern display technology, biological expertise, and entertainment to provide themed journeys through European and tropical waters.
190	Seas Disney World Epcot	0	0	0	0	1986	27	1	1	0	0	0			0	Null
191	Seattle Aquarium	28	725	1	6	1977	36	1	0	0	0	1	2012	2920103	0	Inspiring conservation of our marine environment.
192	Sea World Orlando	12	113	0	0	1973	40	1	1	0	0	0			0	Null
193	Sea World San Antonio	13	181	0	0	1988	25	1	1	0	0	0			0	Null
194	Sea World San Diego	41	266	0	0	1964	49	1	1	0	0	0			0	Null
195	Sedgwick County Zoo	0	0	0	0	1971	42	1	0	0	1	0	2013	2988475	1	The Sedgwick County Zoological Society is a not-for-profit, scientific, and educational organization chartered in 1963 to foster public interest and support in and for the Sedgwick County Zoo. Its purposes are primarily conservation, recreation, education, and research. The Zoological Society manages the Sedgwick County Zoo under a written contract with the Sedgwick County Board of Commissioners.…
196	Seneca Park Zoo	5	11	0	0	1894	119	1	0	0	1	0	2013	2102506	0	Through the exhibition of animals in naturalistic settings, the Seneca Park Zoo will provide engaging and educational experiences to give our community the motivation and skills to act as stewards of the environment.
197	Sequoia Park Zoo	1	1	0	0	1907	106	1	0	0	1	0	2012	251535	0	To inspire wonder, understanding and respect for the natural world by providing fun, rewarding, educational experiences that encourage meaningful connections between animals, humans, and our environment.
198	Shark Reef Aquarium Mandalay Bay	1	2	0	0	2000	13	1	1	0	0	0			1	Shark Reef is dedicated to establishing and maintaining the highest standards of animal care, to providing its visitors with an entertaining and educational experience, and to the practice of meaningful research and conservation initiatives.
199	Smithsonian National Zoological Park	650	17636	62	1654	1889	124	1	0	0	1	0	2012	6028735	1	At the Smithsonian's National Zoo, we save species. We provide engaging experiences with animals and create and share knowledge to save wildlife and habitats.
200	South Carolina Aquarium	6	86	0	0	2000	13	1	0	0	0	1	2013	4587703	1	The South Carolina Aquarium inspires conservation of the natural world by exhibiting and caring for animals, by excelling in education and research, and by providing an exceptional visitor experience.
201	Squam Lakes Natural Science Center	0	0	0	0	1969	44	1	0	0	0	1	2013	8847166	0	Squam Lakes Natural Science Center's mission is to advance understanding of ecology by exploring New Hampshire's natural world. Squam Lakes Natural Science Center's educational philosophy is that ecological understanding is fully as important as reading, writing, and arithmetic to the development of an educated citizenry. Squam Lakes Natural Science Center's many and varied educational offerings …
202	Staten Island Zoo	0	0	0	0	1936	77	1	0	0	0	1	2013	923423	1	1 To disseminate a knowledge of Zoology and an appreciation of animal life 2 To maintain a zoological garden where small mammals, birds, reptiles, amphibial and tropical fish will be on display for observation and study 3 Through local facilities, readily accessible to all of Staten Island to instill children an understanding and appreciation of living creatures and 4 To provide lectures and faci…
203	Steinhart Aquarium	4	12	0	0	1923	90	1	0	0	0	1	2012	557783836	0	Explore, explain and sustain life on Earth.
204	Stone Zoo	0	0	0	0	1905	108	1	0	0	0	1	2013	14614301	1	Zoo New England manages Franklin Park Zoo in Boston and Stone Zoo in Stoneham, Massachusetts. Zoo New England's mission is to inspire people to protect and sustain the natural world for future generations by creating fun and engaging experiences that integrate wildlife and conservation programs, research and education.
205	Sunset Zoological Park	0	0	0	0	1933	80	1	0	0	1	0	2013	146930	0	To inspire conservation of the natural world.
206	Tautphaus Park Zoo	2	0	0	0	1934	79	1	0	0	1	0	2013	21653	0	To increase public awareness, knowledge, and appreciation of wild animals, plants animal habitat, species conservation and the environment.
207	Temaiken Foundation	3	6	0	0	2002	11	0	0	0	1	0			1	yes on research: http://www.temaiken.org.ar/en/sec_quienes_somos_subsecciones.php?id=1&categoria=1
208	Tennessee Aquarium	34	262	2	12	1992	21	1	0	0	0	1	2012	44088649	0	The Tennessee Aquarium inspires wonder, appreciation and protection of water and all life that it sustains.
209	Texas State Aquarium	0	0	0	0	1990	23	1	0	0	0	1	2012	28060127	0	The Texas State Aquarium's mission is to connect people with nature and inspire conservation of the Gulf of Mexico. To accomplish this goal, the Aquarium has developed more than 25 permanent and special exhibits to interpret the animals and sensitive ecosystems of the Gulf, educating more than 550,000 visitors annually in the wonders of the marine world. The Texas State Aquarium promotes and acti…
210	Toledo Zoological Gardens	30	160	1	49	1900	113	1	0	0	0	1	2013	117311065	0	Inspiring others to join us in caring for animals and conserving the natural world.
211	Topeka Zoo	3	41	0	0	1933	80	1	0	0	1	0	2012	527831	0	The mission of the Topeka Zoological Park is to enrich the community through wildlife conservation and education.
212	Tracy Aviary	1	79	0	0	1938	75	1	0	0	1	0	2013	4467740	0	Through the presentation of avian species, Tracy Aviary Bird Programs encourages curiosity about and connectivity to the natural world with an aim to inspiring lifelong environmental stewardship.
213	Trevor Zoo	0	0	0	0	1936	77	1	0	0	0	1	2014	80490539	0	As part of the science and community service programs and of the overall curriculum of Millbrook School, the Trevor Zoo encourages its students to act as stewards of the natural world and to serve others…The staff and students welcome all visitors to enjoy the zoo and advance its educational and conservation mission.
214	Tulsa Zoo	13	19	0	0	1927	86	1	0	0	1	0	2013	13095201	0	Inspiring passion for wildlife in every guest, every day.
215	Turtle Back Zoo	0	0	0	0	1963	50	1	0	0	1	0	2013	1804657	0	Committed to providing an enriching recreational experience that fosters excellence in wildlife education and wildlife conservation, so that present and future generations are inspired to understand, appreciate and protect the fragile interdependence of all living things.
216	Utah Hogle Zoo	4	13	0	0	1931	82	1	0	0	1	0	2013	67165050	0	Nurtures respect and appreciation for the natural world by providing diverse educational, recreational and conservation opportunities. This is accomplished through imaginative exhibits and programs, professional animal care, and a commitment to excellence.
217	Vancouver Aquarium Marine Science Centre	93	1550	1	14	1956	57	0	0	0	1	0			1	The Vancouver Aquarium is a self-supporting, non-profit association dedicated to effecting the conservation of aquatic life through display and interpretation, education, research, and direct action.
218	Virginia Aquarium Marine Science Center	16	154	2	12	1986	27	1	0	0	1	0	2014	16938991	0	To increase the public's knowledge and appreciation of Virginia's marine environment and inspire commitment to preserve its existence.
219	Virginia Living Museum	1	0	0	0	1966	47	1	0	0	0	1	2014	19065260	0	Connecting people to nature through educational experiences that promote conservation.
220	Virginia Zoological Park	0	0	0	0	1900	113	1	0	0	1	0	2014	4119839	1	The Virginia Zoological Park seeks to increase understanding of the world’s flora and fauna and to add to the growing body of knowledge about them; to display animals respectfully, in a way that encourages their natural behavior; to conserve animals and their habitats; and to offer opportunities for learning and enjoyment to the public. It will strive to fulfill this mission through education, co…
221	Western North Carolina Nature Center	0	0	0	0	1973	40	1	0	0	1	0	2013	705869	0	The Western North Carolina Nature Center connects people with the animals and plants of the Southern Appalachian Mountain region by inspiring appreciation, nurturing understanding, and advancing conservation of the region’s rich biodiversity.
222	Wildlife Safari	8	27	0	0	1973	40	1	0	0	0	1	2013	4948499	1	To enhance entertainment, education, and cultural experiences with a commitment to conservation, preservation, and research of native and exotic wildlife.
223	The Wilds	23	100	1	0	1994	19	1	0	0	0	1	2013	13963110	1	The mission of the Wilds is to advance conservation through science, education and personal experience.
224	Woodland Park Zoo	22	131	0	0	1899	114	1	0	0	0	1	2013	22531707	0	Woodland Park Zoo saves animals and their habitats through conservation leadership and engaging experiences, inspiring people to learn, care and act.
225	Zoo Atlanta	219	2325	7	164	1889	124	1	0	0	0	1	2013	44433402	1	Zoo Atlanta’s mission is to inspire the citizens of Atlanta and Georgia and all visitors to the Zoo to value wildlife on Earth and to help safeguard existing species through conservation. It does this by 1) providing an informative, educational and engaging experience; 2) being respectful and responsible stewards of the animals and the physical and financial assets entrusted to it and 3) engaging…
226	Zoo Boise	2	0	0	0	1916	97	1	0	0	1	0	2013	666801	0	Zoo Boise connects our visitors with animals to inspire and involve our community in the conservation of wildlife worldwide.
227	Zoo Miami	19	118	0	0	1980	33	1	0	0	1	0	2013	13984626	0	The Zoological Society of Florida and Zoo Miami's mission is to encourage an appreciation for the world's wildlife and to help conserve it for future generations.
228	ZooAmerica Wildlife Park	0	0	0	0	1906	107	1	1	0	0	0			0	ZooAmerica prides itself on following a mission of education and conservation.
